# Supplementary material for: The efficient immobilization of uranium(vi) by modified dendritic fibrous nanosilica (DFNS) using mussel bioglue
Source: Royal Society of Chemistry journal article supplement (doi:10.1039/c8qi01351a), 2019-01-01
Supplement: c8qi01351a1.pdf [file c8qi01351a1.pdf]

*Electronic Supplementary Information for*

# Efficient immobilization of uranium (VI) by modified dendritic fibrous nanosilica (DFNS) using mussel bioglue

*Peipei Yang<sup>a,c</sup>, Rongrong Chen<sup>a,c\*</sup>, Qi Liu<sup>a,c</sup>, Hongsen Zhang<sup>a,c</sup>, Jingyuan Liu<sup>a,c</sup>, Jing Yu<sup>a,c</sup>, Peili Liu<sup>b</sup>, Xuefeng Bai<sup>c</sup> and Jun Wang<sup>a,b,c,d\*</sup>*

<sup>a</sup> Key Laboratory of Superlight Material and Surface Technology, Ministry of Education, Harbin Engineering University, 150001, PR China.

<sup>b</sup> Harbin Engineering University Capital Management Co. Ltd., P. R. China

<sup>c</sup> College of Material Science and Chemical Engineering, Harbin Engineering University, 150001, PR China.

<sup>d</sup> Institute of Advanced Marine Materials, Harbin Engineering University, 150001, PR China.

*\* Corresponding author: Email: zhqw1888@sohu.com, chenrongrong@hrbeu.edu.cn.*

## SI.1 Materials and methods

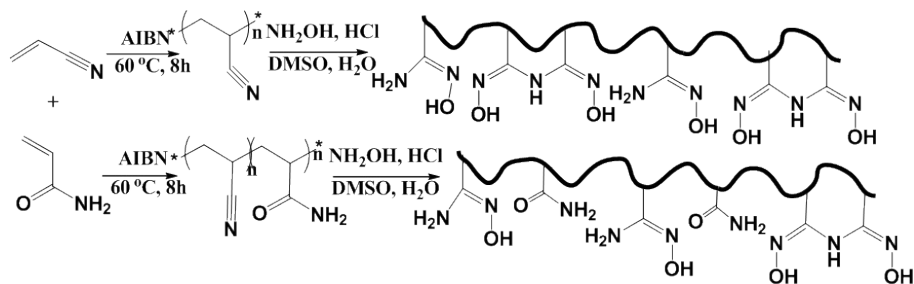

**Scheme S1.** Proposed schematic diagram of AOPNI and AOPNI-NH<sub>2</sub> composites.

## SI.2 Morphological performance

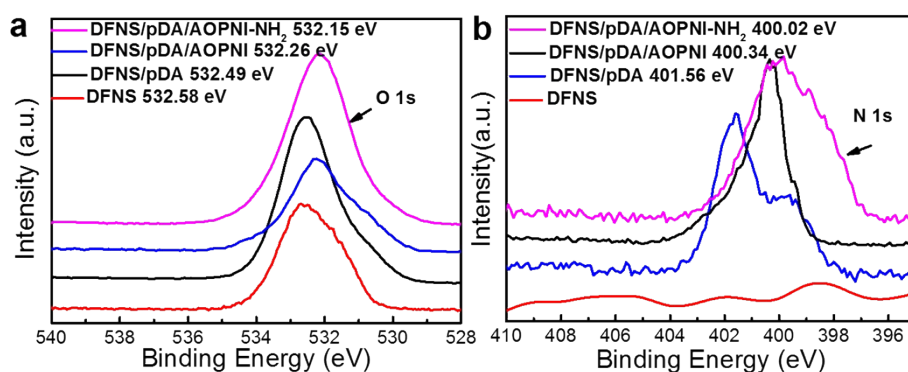

**Figure S1.** XPS spectroscopy patterns of O 1s (a), N 1s (b) of DFNS, DFNS/pDA, DFNS/pDA/AOPNI and DFNS/pDA/AOPNI-NH<sub>2</sub> composites.

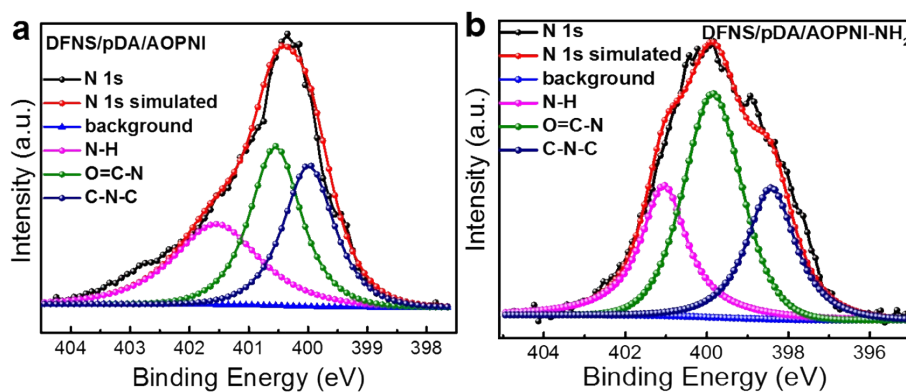

**Figure S2.** The high resolution N 1s XPS spectra of DFNS/pDA/AOPNI (a) and DFNS/pDA/AOPNI-NH<sub>2</sub> composites (b).

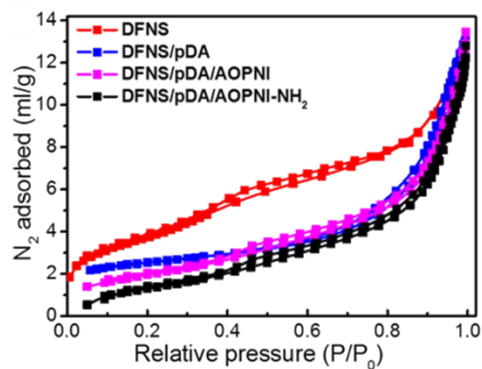

**Figure S3.**  $N_2$  adsorption/desorption isotherms of DFNS, DFNS/pDA, DFNS/pDA/AOPNI and DFNS/pDA/AOPNI-NH<sub>2</sub>.

### SI.3 Adsorption studies

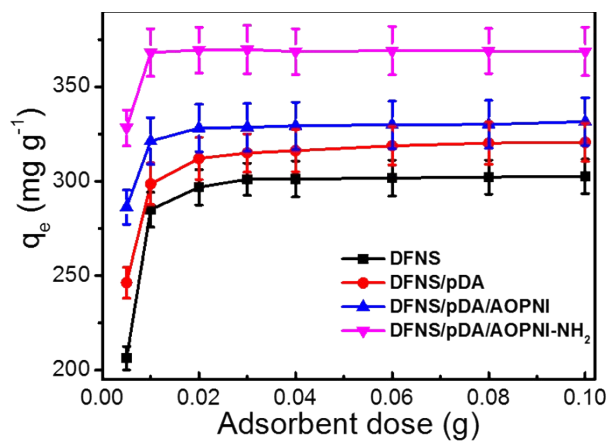

**Figure S4.** Effects of adsorbent dose on U(VI) adsorption by DFNS, DFNS/pDA, DFNS/pDA/AOPNI and DFNS/pDA/AOPNI-NH<sub>2</sub>.

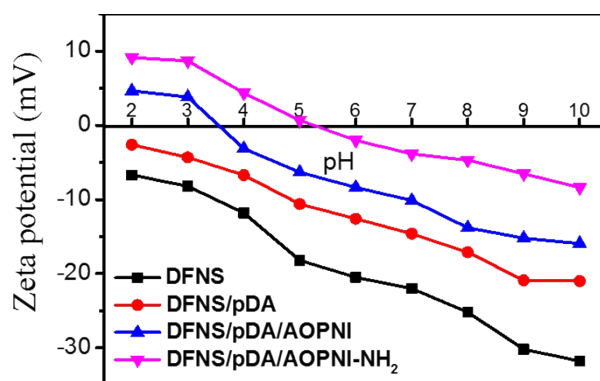

**Figure S5.**  $\zeta$ -potential of DFNS, DFNS/pDA, DFNS/pDA/AOPNI and DFNS/pDA/AOPNI-NH<sub>2</sub> at different pH values.

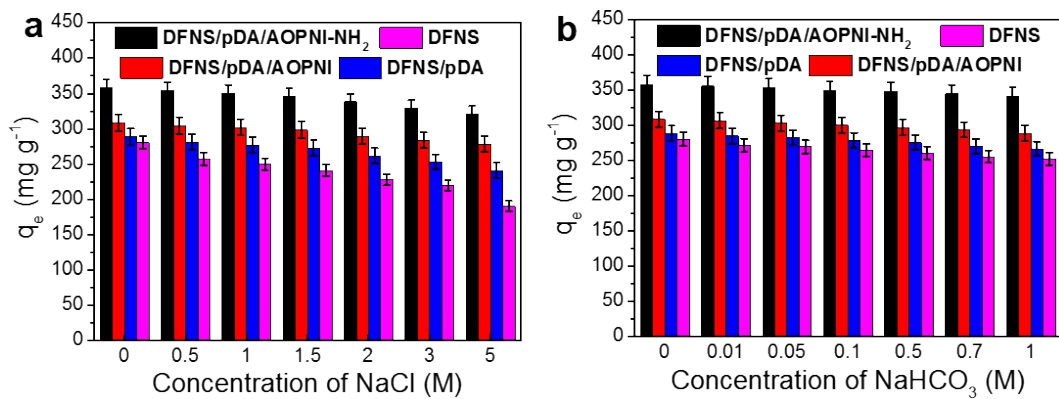

**Figure S6.** Effects of solution ionic strength on U(VI) adsorption by DFNS, DFNS/pDA, DFNS/pDA/AOPNI and DFNS/pDA/AOPNI-NH<sub>2</sub>.

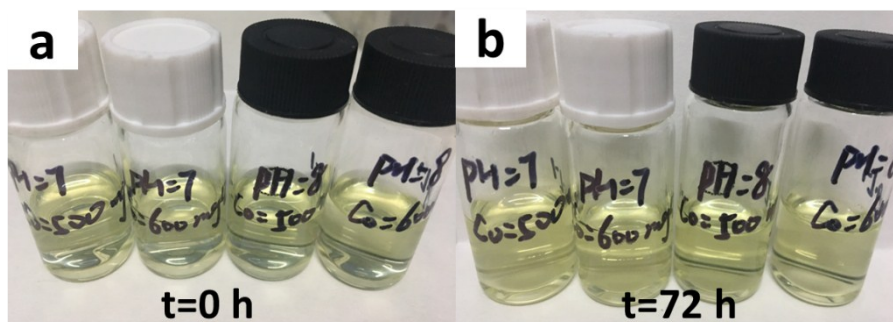

**Figure S7.** The digital photos of 500 mg g<sup>-1</sup> and 600 mg g<sup>-1</sup> uranium solution at pH=7, 8 for 72 h.

#### SI.4 Kinetics study

As the sorption kinetics govern the residence time of the sorption reaction and determine the solute uptake rate or the efficiency of the reaction, the following pseudo-first-order, pseudo-second-order and Weber-Morris (W-M) models are employed to interpret the mechanism controlling the sorption process. The linear form of the two models can be expressed by the following Eqs. S1-S3:

$$\ln(q_e - q_t) = \ln q_e - k_1 t \quad (\text{S1})$$

$$t/q_t = 1/k_2 q_e^2 + t/q_e \quad (\text{S2})$$

$$q_e = K_{ip} \sqrt{t} + C \quad (\text{S3})$$

Where  $q_t$  and  $q_e$  ( $\text{mg g}^{-1}$ ) are the capacity of U(VI) at time  $t$  (min) and at equilibrium,  $K_{ip}$  is Internal diffusion constant, respectively, and  $k_1$  ( $\text{min}^{-1}$ ) and  $k_2$  ( $\text{g mg}^{-1} \text{min}^{-1}$ ) are the respective rate constants.

**Table S1** Kinetic parameter for adsorption of U (VI)

| Kinetics model      | U(VI) initial concentration | Materials                      | K                    | $q_e^{\text{exp}}$ | $q_e^{\text{cal}}$ | $R^2$   |
|---------------------|-----------------------------|--------------------------------|----------------------|--------------------|--------------------|---------|
| Pseudo-first order  | 500 $\text{mg g}^{-1}$      | DFNS                           | 0.0081               | 615                | 142.8              | 0.47106 |
|                     |                             | DFNS/pDA                       | 0.0083               | 620                | 160.6              | 0.88988 |
|                     |                             | DFNS/pDA/AOPNI                 | 0.0084               | 650                | 165.4              | 0.56698 |
|                     |                             | DFNS/pDA/AOPNI-NH <sub>2</sub> | 0.0085               | 653                | 171.5              | 0.59466 |
| Pseudo-second order | 500 $\text{mg g}^{-1}$      | DFNS                           | $1.5 \times 10^{-4}$ | 615                | 636                | 0.99965 |
|                     |                             | DFNS/pDA                       | $1.5 \times 10^{-4}$ | 620                | 645                | 0.99971 |
|                     |                             | DFNS/pDA/AOPNI                 | $1.4 \times 10^{-4}$ | 650                | 685                | 0.99961 |
|                     |                             | DFNS/pDA/AOPNI-NH <sub>2</sub> | $1.5 \times 10^{-4}$ | 653                | 667                | 0.99962 |

**Table S2** Morris-Weber model parameter for adsorption of U (VI)

| Materials                      | $K_{ip}^1$ | $K_{ip}^2$ | $C^1$ | $C^2$ |
|--------------------------------|------------|------------|-------|-------|
| DFNS                           | 38.64      | 0.086      | 185   | 620   |
| DFNS/pDA                       | 38.85      | 0.468      | 190.9 | 621   |
| DFNS/pDA/AOPNI                 | 39.9       | 0.589      | 198.4 | 641   |
| DFNS/pDA/AOPNI-NH <sub>2</sub> | 40.1       | 0.865      | 205.7 | 655   |

### SI.5 Isotherms study

In order to probe the maximum adsorption capacity and the progress of adsorption, the adsorption isotherms was studied. The adsorption of U (VI) on the DFNS, DFNS/pDA, DFNS/pDA/AOPNI and DFNS/pDA/AOPNI-NH<sub>2</sub>

composites increased with increasing temperature and the Langmuir and Freundlich models were applied to simulate experimental data.

$$C_e/q_e = 1/b \cdot q_m + C_e/q_m \quad (S4)$$

$$\ln q_e = \ln k + 1/n \ln C_e \quad (S5)$$

Where  $C_e$  ( $\text{mg L}^{-1}$ ) is the equilibrated U (VI) concentration,  $q_e$  ( $\text{mg g}^{-1}$ ) is the amount of U (VI) adsorbed on the adsorbents capacity at equilibrium.  $K$  ( $\text{L mg}^{-1}$ ) is a Langmuir constant related to the energy of the adsorbent and  $q_m$  ( $\text{mg g}^{-1}$ ) is the saturation capacity at complete monolayer coverage.

Dubinin-Radushkevich (D-R) model was used to explain the U(VI) adsorption behaviour

$$\ln q_e = \ln q_m - \beta \varepsilon^2 \quad (S6)$$

Where  $q_e$  ( $\text{mg g}^{-1}$ ) is the amount of U (VI) adsorbed on the adsorbents capacity at equilibrium,  $\beta$  is activity and  $\varepsilon$  is the polanyi potential. In this formula, the  $\varepsilon$  was calculated by the following equations:

$$\varepsilon = RT \ln (1 + 1/C_e) \quad (S7)$$

$$E = 1/\sqrt{2\beta} \quad (S8)$$

$$\ln K_d = \frac{\Delta S^\circ}{R} - \frac{\Delta H^\circ}{RT} \quad (S9)$$

$$\Delta G^\circ = \Delta H^\circ - T\Delta S^\circ \quad (S10)$$

$$K_d = \frac{q_e}{C_e} = \frac{(C_o - C_e)}{C_e} \cdot \frac{V}{m} \quad (S11)$$

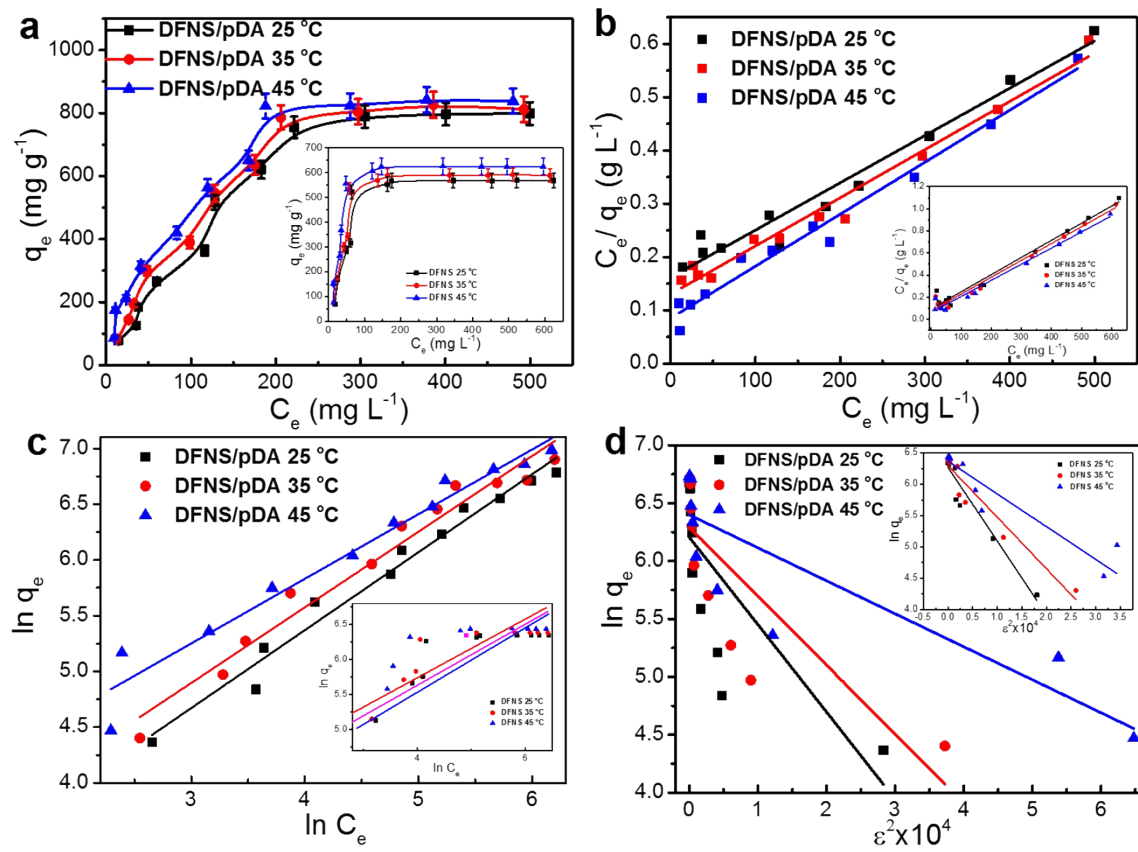

**Figure S8.** a) Isotherm model for DFNS (inset) and DFNS/pDA composites; b) Langmuir model; c) Freundlich model; d) Dubinin-Radushkevich model.

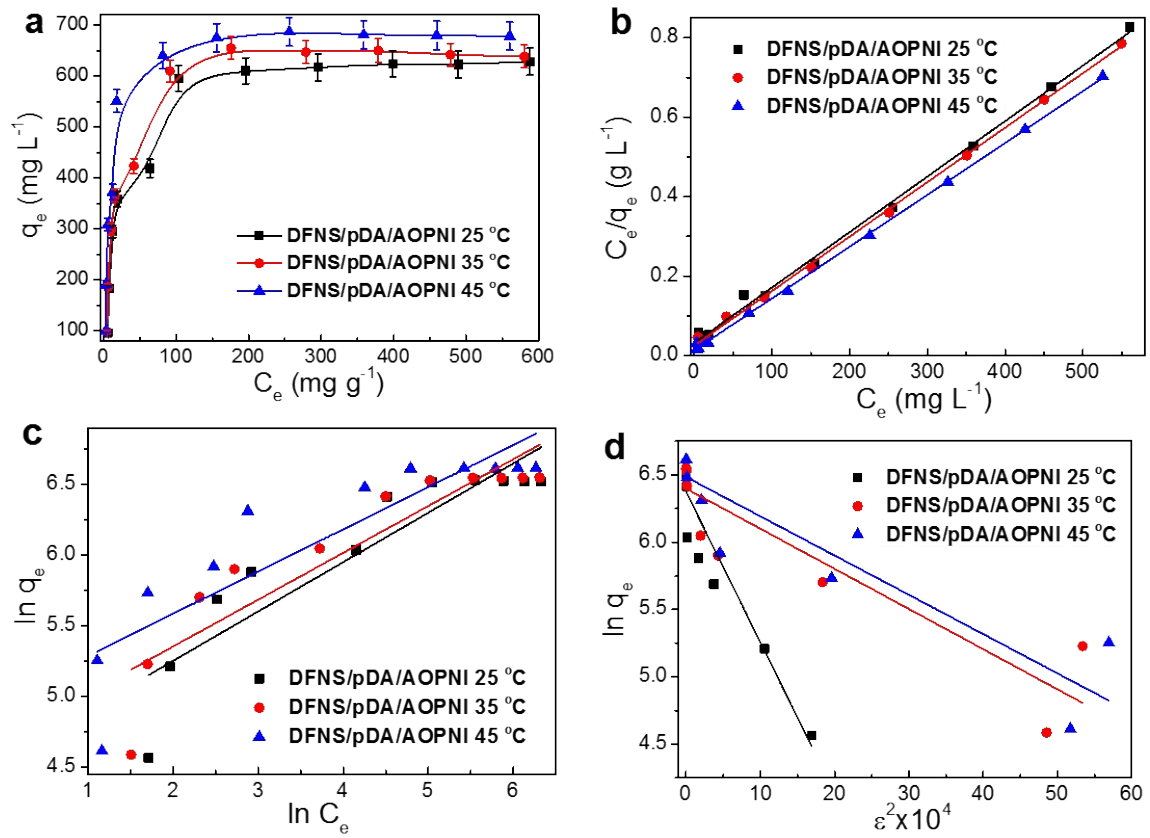

**Figure S9.** a) Isotherm model for DFNS/pDA/AOPNI composites; b) Langmuir model; c) Freundlich model; d) Dubinin-Radushkevich model.

**Table S3** Isotherm parameter for adsorption of U (VI)

| Materials      | T<br>(K) | Langmuir isotherm      |                        |                        |         | Freundlich isotherm    |      |         |
|----------------|----------|------------------------|------------------------|------------------------|---------|------------------------|------|---------|
|                |          | $q^{\text{exp}}$       | $q_0$                  | $b$                    | $R^2$   | $K$                    | $n$  | $R^2$   |
|                |          | ( $\text{mg g}^{-1}$ ) | ( $\text{mg g}^{-1}$ ) | ( $\text{L mg}^{-1}$ ) |         | ( $\text{L mg}^{-1}$ ) |      |         |
| DFNS           | 298      | 567.14                 | 645                    | 0.0164                 | 0.97023 | 40.26                  | 2.18 | 0.66321 |
|                | 308      | 589.69                 | 653                    | 0.0202                 | 0.97933 | 48.93                  | 2.29 | 0.65429 |
|                | 318      | 625.11                 | 684                    | 0.0241                 | 0.98024 | 58.35                  | 2.39 | 0.64563 |
| DFNS/pDA       | 298      | 620                    | 723                    | 0.0603                 | 0.97751 | 13.15                  | 1.43 | 0.92347 |
|                | 308      | 632                    | 702                    | 0.0007                 | 0.96288 | 17.51                  | 1.47 | 0.95897 |
|                | 318      | 653                    | 726                    | 0.0045                 | 0.95491 | 33.52                  | 1.73 | 0.88452 |
| DFNS/pDA/AOPNI | 298      | 675                    | 714                    | 0.0445                 | 0.99672 | 298.29                 | 2.86 | 0.81343 |
|                | 308      | 684                    | 730                    | 0.0542                 | 0.99877 | 327.42                 | 3.02 | 0.81677 |

|                                |     |     |     |        |         |        |      |         |
|--------------------------------|-----|-----|-----|--------|---------|--------|------|---------|
|                                | 318 | 745 | 769 | 0.0963 | 0.99932 | 377.97 | 3.35 | 0.75365 |
|                                | 298 | 657 | 712 | 0.0291 | 0.99337 | 71.59  | 2.56 | 0.78778 |
| DFNS/pDA/AOPNI-NH <sub>2</sub> | 308 | 664 | 721 | 0.0342 | 0.99450 | 79.89  | 2.66 | 0.76255 |
|                                | 318 | 735 | 753 | 0.0465 | 0.99607 | 101.16 | 2.81 | 0.75796 |

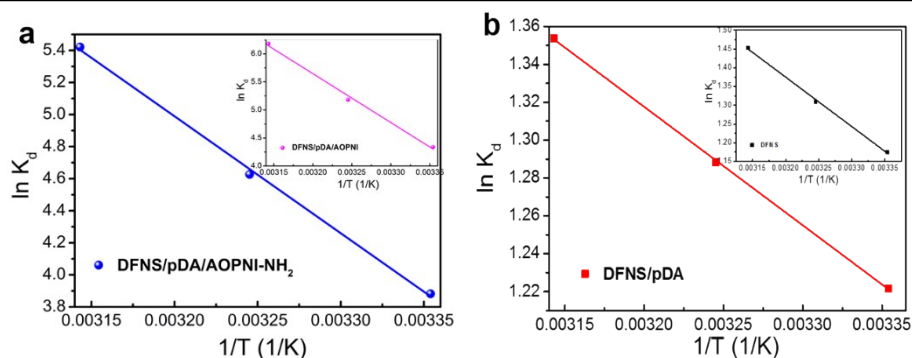

**Figure S10.** The influence of temperature on the U(VI) sorption on the a) DFNS/pDA/AOPNI (inset), DFNS/pDA/AOPNI-NH<sub>2</sub> and b) DFNS (inset), DFNS/pDA relationship curve between  $\ln K_d$  and  $1/T$  (1/K). pH= 8.0; T= 25 °C; amount of adsorbent 0.01 g and t= 180 min.

**Table S4** The thermodynamic parameters of DFNS, DFNS/pDA, DFNS/pDA/AOPNI and DFNS/pDA/AOPNI-NH<sub>2</sub> for U(VI) adsorption

| material                       | $\Delta H^\circ$        | $\Delta S^\circ$                       | $\Delta G^\circ$        |         |         |
|--------------------------------|-------------------------|----------------------------------------|-------------------------|---------|---------|
|                                | (kJ mol <sup>-1</sup> ) | (J mol <sup>-1</sup> K <sup>-1</sup> ) | (kJ mol <sup>-1</sup> ) |         |         |
|                                |                         |                                        | 298.15K                 | 308.15K | 318.15K |
| DFNS                           | 10.96                   | 46.51                                  | -2.91                   | -3.37   | -3.84   |
| DFNS/pDA                       | 5.199                   | 27.59                                  | -3.03                   | -3.31   | -3.58   |
| DFNS/pDA/AOPNI                 | 72.52                   | 279.02                                 | -10.67                  | -13.46  | -16.25  |
| DFNS/pDA/AOPNI-NH <sub>2</sub> | 60.65                   | 235.58                                 | -9.59                   | -11.94  | -14.3   |

## SI.6 Effect of co-existing ions

**Table S5** The concentrations of the competing cations.

| Cations                              | U <sup>6+</sup> | Ca <sup>2+</sup> | K <sup>+</sup> | Al <sup>3+</sup> | Na <sup>+</sup> | Zn <sup>2+</sup> | Mg <sup>2+</sup> | Sr <sup>2+</sup> | Ni <sup>2+</sup> |
|--------------------------------------|-----------------|------------------|----------------|------------------|-----------------|------------------|------------------|------------------|------------------|
| C <sub>0</sub> (mg L <sup>-1</sup> ) | 198.9           | 32.79            | 33.16          | 23.59            | 156.6           | 46.3             | 18.77            | 52.26            | 44.9             |

The selectivity coefficient ( $S_U$ ) for U(VI), is defined as a specific term to describe the potency and degree of selectivity of the adsorbents as follows:

$$S_U = \frac{K_d^U}{K_d^M} \quad (S12)$$

Where  $K_d^U$  and  $K_d^M$  are the distribution ratio of the U(VI) ion and other competing ions in sorbent and solution, respectively.

**Table S6** The selectivity coefficients ( $S_{U/M}$ ) of U(VI) for different metal ions in water.

|                                           | K     | Al   | Na   | Ca    | Sr    | Zn   | Ni     | Mg   |
|-------------------------------------------|-------|------|------|-------|-------|------|--------|------|
| DFNS $S_{U/M}$                            | 118.2 | 4.03 | 10.3 | 114.2 | 44.3  | 48.4 | 100.32 | 9.9  |
| DFNS/pDA $S_{U/M}$                        | 128.8 | 1.67 | 69.6 | 126.4 | 887.5 | 118  | 109.3  | 20.1 |
| DFNS/pDA/AOPNI $S_{U/M}$                  | 447   | 4.8  | 2412 | 381   | 3667  | 592  | 229    | 80   |
| DFNS/ pDA/AOPNI-NH <sub>2</sub> $S_{U/M}$ | 599.3 | 4.7  | 7817 | 1807  | 2361  | 605  | 184    | 79.8 |

## SI.7 Adsorption-desorption experiments

### SI.7.1 U (VI) desorption experiments

The recyclability and reuse of adsorbents play an important role in the extraction of U(VI) from seawater. The eluent agents of NaCl, Citric acid, HNO<sub>3</sub>, NaHCO<sub>3</sub>, and NaOH were first investigated for desorption of U(VI). The results from Figure S11a demonstrate that HNO<sub>3</sub> is the best eluent agent for reuse and recyclability of DFNS, DFNS/pDA, DFNS/pDA/AOPNI and DFNS/pDA/AOPNI-NH<sub>2</sub> adsorbents. Meanwhile, we observe that elution efficiency of DFNS/pDA/AOPNI and DFNS/pDA/AOPNI-NH<sub>2</sub> adsorbents are slightly lower than the others in the acid and base of aqueous solution, which means that strong chelation interactions by metal ions and the

DFNS/pDA/AOPNI and DFNS/pDA/AOPNI-NH<sub>2</sub>. Moreover, The desorption of DFNS/pDA/AOPNI and DFNS/pDA/AOPNI-NH<sub>2</sub> difficult in the process of extraction of U(VI) from weak base aqueous solution (pH=8.4). Based on the above data, when the adsorbent is added to an aqueous solution of pH=8, the adsorption capacity is much greater than desorption. It means that the U(VI) can be saved on the surface of adsorbent, then we can use HNO<sub>3</sub> desorption for U(VI) in the lab, which opens up a possibility for the practical application of DFNS/pDA/AOPNI and DFNS/pDA/AOPNI-NH<sub>2</sub> adsorbents in seawater. Meanwhile, we examined the effect of different concentrations of HNO<sub>3</sub> for adsorption-desorption of U(VI) onto DFNS, DFNS/pDA, DFNS/pDA/AOPNI and DFNS/pDA/AOPNI-NH<sub>2</sub>. The results, given in Figure S11b, indicate that the change in eluent rate responds smoothly to increasing concentration of HNO<sub>3</sub>, especially when nitrate concentrations are above 0.1 M. Taking into account these factors and cost issues, 0.1 M HNO<sub>3</sub> was used for the next step, which is the regeneration of DFNS, DFNS/pDA, DFNS/pDA/AOPNI and DFNS/pDA/AOPNI-NH<sub>2</sub> adsorbents for U(VI). In a typical experiment, 20 mg of sorbent with U (VI) ions was added into 50 mL eluent solution, which included in 0.1 M NaCl, 0.1 M Citric acid, 0.1 M HNO<sub>3</sub>, 0.1 M NaHCO<sub>3</sub> and 0.1 M NaOH, respectively. The flasks were stirred for specified time (t, min) at room temperature, and then the solid phase was separated from the solution by centrifuge. The results were analysed with WGJ-III Trace Uranium Analyser to

obtain the concentrations of U (VI) ions. The elution rate of U (VI) ions was calculated.

#### **SI.7.2 U (VI) adsorption-desorption cycle experiments**

In a typical experiment, 20 mg of sorbent was added into 50 mL of U (VI) solution and stirred for 6 h at room temperature. The solid phase was separated from the solution by centrifuge. Then, the sorbent in the vacuum drying oven for 12 h. The dried sorbent was placed in the 50 mL eluent solution (0.1 M HNO<sub>3</sub>) for the 6 h. After elution, the DFNS, DFNS/pDA, DFNS/pDA/AOPNI and DFNS/pDA/AOPNI-NH<sub>2</sub> composites was washed with abundant deionized water to remove residual H<sup>+</sup> and UO<sub>2</sub><sup>2+</sup> until cannot detect UO<sub>2</sub><sup>2+</sup> in the aqueous solutions. The DFNS, DFNS/pDA, DFNS/pDA/AOPNI and DFNS/pDA/AOPNI-NH<sub>2</sub> composites were regenerated by drying at 80 °C for 24 h and then reused. Eventually the elution efficiency of U (VI) ions was calculated. Repeat this experiment operation for five times.

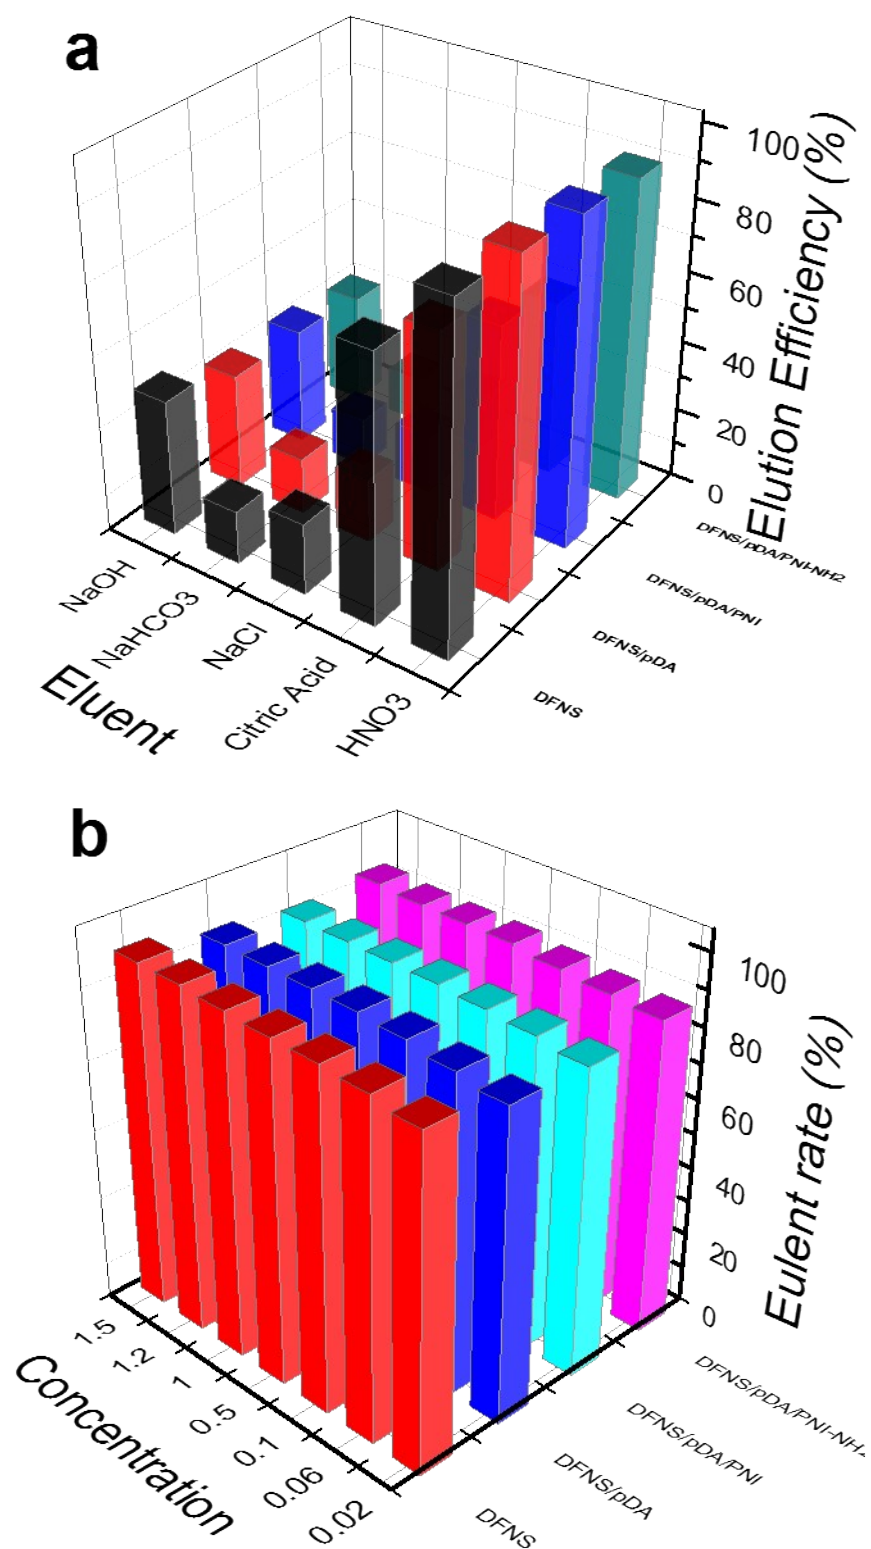

**Figure S11.** The effect of a) different eluent and b) different concentration eluent of HNO<sub>3</sub> on desorption of DFNS, DFNS/pDA, DFNS/pDA/AOPNI and DFNS/pDA/AOPNI-NH<sub>2</sub> composite

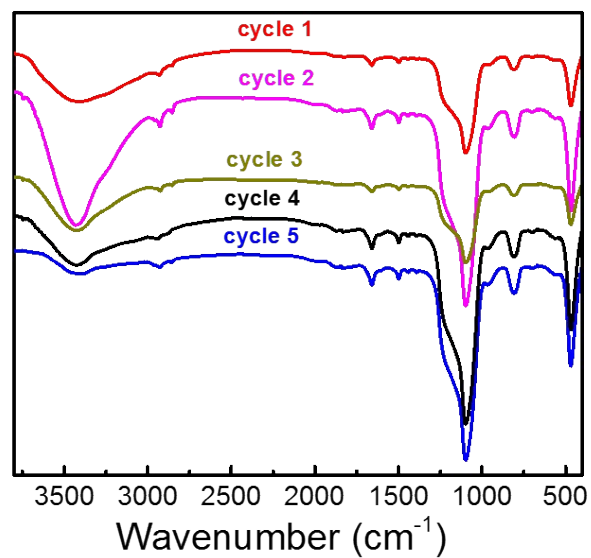

**Figure S12.** The FTIR spectra of DFNS/pDA/AOPNI-NH<sub>2</sub> composites after 5 cycles.

### SI.8 Simulated seawater experiments

**Table S7** Selected results of DFNS/pDA/AOPNI-NH<sub>2</sub> for the extraction of uranyl ions from simulated seawater

| Elements | Ion concentration         |                           | Removal (%) |
|----------|---------------------------|---------------------------|-------------|
|          | initial                   | final                     |             |
| U        | 3.524 µg L <sup>-1</sup>  | 0.24 µg L <sup>-1</sup>   | 93.1        |
| Al       | 14.731 µg L <sup>-1</sup> | 8.125 µg L <sup>-1</sup>  | 44.8        |
| Ni       | 11.815 µg L <sup>-1</sup> | 10.563 µg L <sup>-1</sup> | 10.6        |
| Ca       | 306.9 mg L <sup>-1</sup>  | 287.42 mg L <sup>-1</sup> | 6.4         |
| K        | 282.3 mg L <sup>-1</sup>  | 266.81 mg L <sup>-1</sup> | 5.5         |
| Mg       | 486.9 mg L <sup>-1</sup>  | 415.92 mg L <sup>-1</sup> | 14.6        |
| Na       | 2347.5 mg L <sup>-1</sup> | 1721.8 mg L <sup>-1</sup> | 26.6        |
| Sr       | 5128.3 µg L <sup>-1</sup> | 4721.4 µg L <sup>-1</sup> | 7.9         |
| Zn       | 38.87 µg L <sup>-1</sup>  | 37.11 µg L <sup>-1</sup>  | 4.5         |

**Table S8** Selected results of DFNS/pDA/AOPNI for the extraction of uranyl ions from simulated seawater

| Elements | Ion concentration           |                              | Removal (%) |
|----------|-----------------------------|------------------------------|-------------|
|          | initial                     | final                        |             |
| U        | 3.524 $\mu\text{g L}^{-1}$  | 0.401 $\mu\text{g L}^{-1}$   | 88.6        |
| Al       | 14.731 $\mu\text{g L}^{-1}$ | 6.922 $\mu\text{g L}^{-1}$   | 53          |
| Ni       | 11.815 $\mu\text{g L}^{-1}$ | 9.583 $\mu\text{g L}^{-1}$   | 19          |
| Ca       | 306.9 $\text{mg L}^{-1}$    | 271.71 $\text{mg L}^{-1}$    | 11.5        |
| K        | 282.3 $\text{mg L}^{-1}$    | 258.36 $\text{mg L}^{-1}$    | 8.5         |
| Mg       | 486.9 $\text{mg L}^{-1}$    | 385.62 $\text{mg L}^{-1}$    | 20.8        |
| Na       | 2347.5 $\text{mg L}^{-1}$   | 1565.31 $\text{mg L}^{-1}$   | 33.3        |
| Sr       | 5128.3 $\mu\text{g L}^{-1}$ | 4621.01 $\mu\text{g L}^{-1}$ | 9.92        |
| Zn       | 38.87 $\mu\text{g L}^{-1}$  | 35.91 $\mu\text{g L}^{-1}$   | 7.6         |

**Table S9** Selected results of DFNS/pDA for the extraction of uranyl ions from simulated seawater

| Elements | Ion concentration           |                              | Removal (%) |
|----------|-----------------------------|------------------------------|-------------|
|          | initial                     | final                        |             |
| U        | 3.524 $\mu\text{g L}^{-1}$  | 0.536 $\mu\text{g L}^{-1}$   | 84.7        |
| Al       | 14.731 $\mu\text{g L}^{-1}$ | 6.547 $\mu\text{g L}^{-1}$   | 55.6        |
| Ni       | 11.815 $\mu\text{g L}^{-1}$ | 9.883 $\mu\text{g L}^{-1}$   | 16.3        |
| Ca       | 306.9 $\text{mg L}^{-1}$    | 263.91 $\text{mg L}^{-1}$    | 14.0        |
| K        | 282.3 $\text{mg L}^{-1}$    | 249.85 $\text{mg L}^{-1}$    | 11.5        |
| Mg       | 486.9 $\text{mg L}^{-1}$    | 358.15 $\text{mg L}^{-1}$    | 26.4        |
| Na       | 2347.5 $\text{mg L}^{-1}$   | 1461.84 $\text{mg L}^{-1}$   | 37.7        |
| Sr       | 5128.3 $\mu\text{g L}^{-1}$ | 4585.73 $\mu\text{g L}^{-1}$ | 10.6        |
| Zn       | 38.87 $\mu\text{g L}^{-1}$  | 35.06 $\mu\text{g L}^{-1}$   | 9.8         |

**Table S10** Selected results of DFNS for the extraction of uranyl ions from simulated seawater

| Elements | Ion concentration           |                             | Removal<br>(%) |
|----------|-----------------------------|-----------------------------|----------------|
|          | initial                     | final                       |                |
| U        | 3.524 $\mu\text{g L}^{-1}$  | 0.611 $\mu\text{g L}^{-1}$  | 82.7           |
| Al       | 14.731 $\mu\text{g L}^{-1}$ | 6.892 $\mu\text{g L}^{-1}$  | 53.2           |
| Ni       | 11.815 $\mu\text{g L}^{-1}$ | 9.572 $\mu\text{g L}^{-1}$  | 19             |
| Ca       | 306.9 $\text{mg L}^{-1}$    | 258.76 $\text{mg L}^{-1}$   | 15.7           |
| K        | 282.3 $\text{mg L}^{-1}$    | 239.9 $\text{mg L}^{-1}$    | 15             |
| Mg       | 486.9 $\text{mg L}^{-1}$    | 336.87 $\text{mg L}^{-1}$   | 30.8           |
| Na       | 2347.5 $\text{mg L}^{-1}$   | 1443.04 $\text{mg L}^{-1}$  | 38.5           |
| Sr       | 5128.3 $\mu\text{g L}^{-1}$ | 4555.3 $\mu\text{g L}^{-1}$ | 11.2           |
| Zn       | 38.87 $\mu\text{g L}^{-1}$  | 33.5 $\mu\text{g L}^{-1}$   | 13.9           |
